# Supplementary material for: Conversion of Cu2O nanowires into Cu2O/HKUST-1 core/sheath nanostructures and hierarchical HKUST-1 nanotubes
Source: Royal Society of Chemistry journal article supplement (doi:10.1039/c6ra22146g), 2016-01-01
Supplement: c6ra22146g1.pdf [file c6ra22146g1.pdf]

Supporting Information for:

## **Conversion of Cu<sub>2</sub>O nanowires into Cu<sub>2</sub>O/HKUST-1 core/sheath nanostructures and hierarchical HKUST-1 nanotubes**

Ting Liu,<sup>a,c</sup> Yongxin Liu,<sup>a,c</sup> Jin Xu,<sup>a</sup> Lili Yao,<sup>a,c</sup> Dan Liu,<sup>a,b</sup> and Cheng Wang<sup>\*a,b</sup>

<sup>a</sup> State Key Laboratory of Rare earth Resource Utilization, Changchun Institute of Applied Chemistry, Chinese Academy of Sciences, Changchun, Jilin 130022, P. R. China. E-mail: cwang@ciac.ac.cn

<sup>b</sup> Tianjin Key Laboratory of Advanced Functional Porous Materials, Institute for New-Energy Materials and Low-Carbon Technologies, Tianjin University of Technology, Tianjin, 300384, P. R. China

<sup>c</sup> University of Chinese Academy of Sciences, Beijing 100049, P. R. China

### **Experimental Section**

#### **Chemicals and Materials**

Benzene-1,3,5-tricarboxylic acid (H<sub>3</sub>BTC) were purchased from Aladdin (Shanghai, China). All solid reagents and solvents used in this study were of analytical grade and used as received from the suppliers without further purification. Ultra-pure water with resistivity larger than 18.0 MΩ was produced from an Ultrapure Water System (Purifier).

#### **Preparation of Cu<sub>2</sub>O Nanowires**

Single crystalline Cu<sub>2</sub>O nanowires with high aspect ratios were synthesized via a modified method described in Li's work<sup>1</sup>. In a typical Cu<sub>2</sub>O nanowires synthesis, 0.10-0.20g Cu(Ac)<sub>2</sub> and 0.10g polyvinyl pyrrolidone (PVP, Mr = 40000) were dissolved in 35 mL deionized water. Afterward, 10 mL of 0.10M pyrrole aqueous solution was added. The mixture was sealed into a 50 mL autoclave and heated at 125 °C in an oven for 12 h. After cooling to ambient temperature naturally, the products were isolated by pouring off the supernatant. The isolated sediments were washed three times with ethanol and dispersed in 10 mL ethanol for storage and following characterizations.

#### **Preparation of Cu<sub>2</sub>O/HKUST-1 Core/Sheath Nanowires and HKUST-1 Nanotubes**

For the synthesis of Cu<sub>2</sub>O/HKUST-1 core/sheath nanowires, 0.5mL of the above-prepared Cu<sub>2</sub>O nanowires dispersed in ethanol was mixed with 0.5mL, 0.16 mol/L H<sub>3</sub>BTC ethanol solution. The mixture was diluted to 2mL with ethanol (EtOH)/ N, N-dimethylacetamide (DMA) solution (3:2, v/v,) and then kept at 30°C until the colour of the nanowires becomes light green. After 140 minutes reaction, the Cu<sub>2</sub>O/HKUST-1 core/sheath were obtained by centrifuging at 7000rpm for 2

min and washed three times with ethanol. The HKUST-1 nanotubes were obtained by immersing the Cu<sub>2</sub>O/HKUST-1 core/sheath in 5mL acetic acid (HAc)/EtOH solution (1:100, v/v) for 24 hours under ambient conditions.

### **Preparation of the primitive HKUST-1**

The primitive HKUST-1 crystals were synthesized by a solvothermal method described in Calero's work<sup>2</sup>. Typically, 0.875 g (3.6 mmol) Cu(NO<sub>3</sub>)<sub>2</sub> · 3H<sub>2</sub>O was dissolved in 12 mL deionized water and mixed with 0.42 g (2.0 mmol) H<sub>3</sub>BTC dissolved in 12 mL ethanol. The resulting solution was stirred for 30 min, and then heated in an autoclave at 383K for 18 h. The as-synthesized crystalline solid was washed with ethanol for three times and then dried at 60°C for 10 h.

### **Adsorption and desorption circulatory experiments**

In a typical process, 10 mg of HKUST-1 nanotubes or primitive crystals was immersed in 5 mL of aqueous dye (methylene blue (MB), methyl orange (MO), rhodamine B (RhB) and congo red (CR)) solution with various concentrations at room temperature. After 6 min sonication, the solution was separated with the solid via centrifugation and subjected to UV-vis adsorption spectroscopy. The desorption experiments were carried out by re-dispersing the adsorbent saturated by either CR or MB dye into ethanol. After 3 min sonication, the adsorbent was separated by centrifugation and dried before reuse in adsorption experiments.

### **Characterization**

Powder X-ray diffraction (PXRD) measurements were performed on a Bruker D8 Advance (Cu  $K_{\alpha 1}$  radiation,  $\lambda=1.5406$  Å) at a scanning rate of 3°/min. Thermogravimetric analysis (TGA) was performed using a Netzsch STA 449 F3 instrument under air atmosphere with a heating rate of 10°C/min. Nitrogen adsorption/desorption isotherm curve was measured at 77 K with a Micromeritics ASAP 2020 analyzer under the degas conditions of 120°C for 8 h. Field emission scanning electron microscopy (FESEM) analysis was conducted with a Hitachi S-4800 scanning electron microscope. Transmission electron microscopy (TEM) images were captured on an FEI Tecnai F20 transmission electron microscope operating at an accelerating voltage of 200 kV. The UV-vis absorption spectra were recorded using a Varian Cary 50 Conc UV-Visible spectrophotometer.

## Supplemental figures

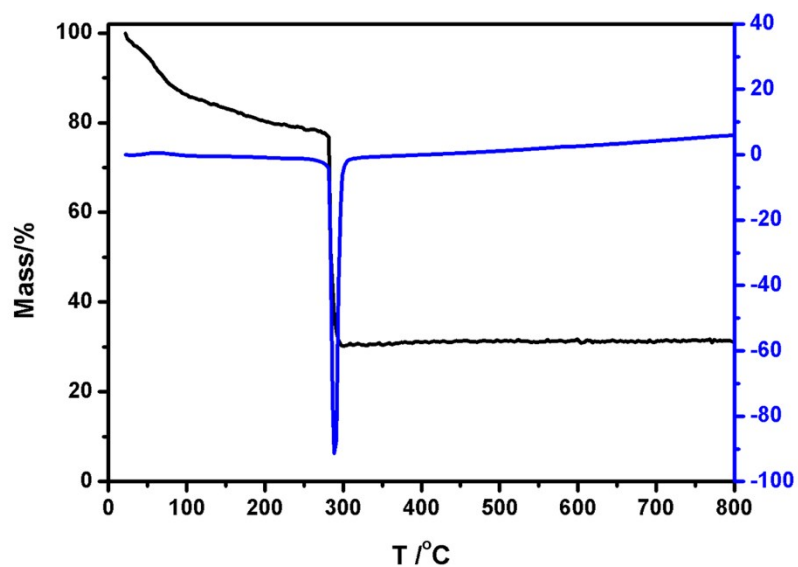

**Fig. S1** Thermogravimetric analysis (TGA) curve of the as-prepared HKUST-1 nanotubes.

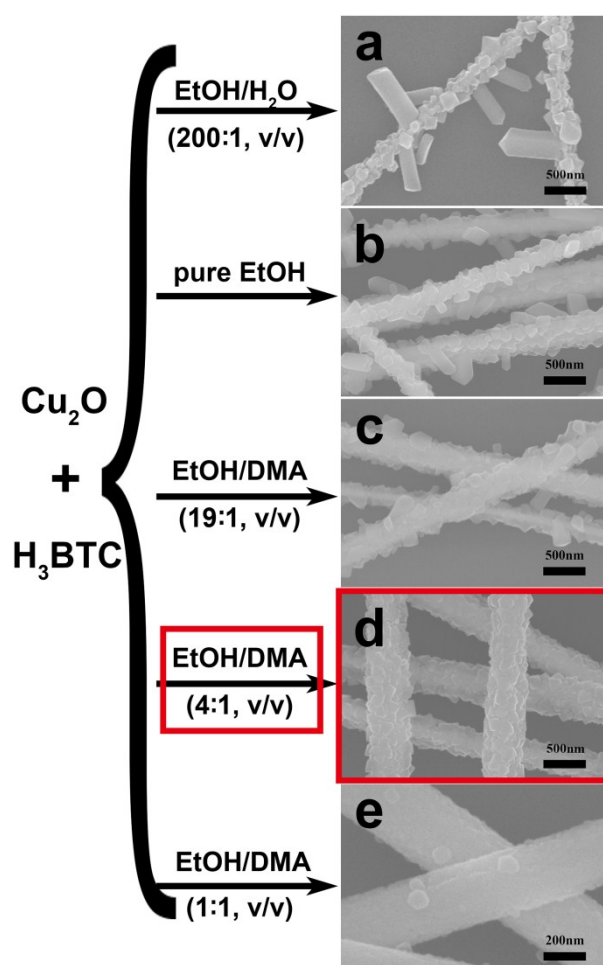

**Fig. S2** FESEM images of  $\text{Cu}_2\text{O}/\text{HKUST-1}$  nanowires obtained in different solvent composites of

(a), EtOH/H<sub>2</sub>O (200:1, v/v); (b), pure EtOH; (c), EtOH/DMA (19:1, v/v); (d), EtOH/DMA (4:1, v/v); and (e), EtOH/DMA (1:1, v/v), respectively.

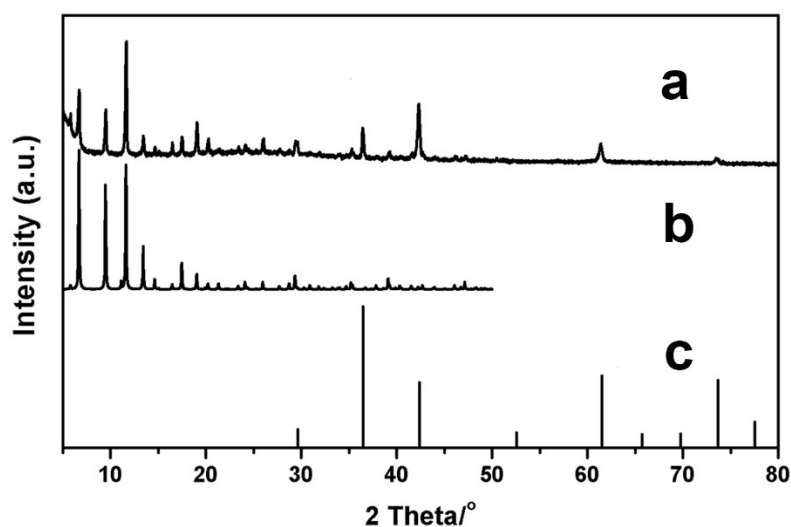

**Fig. S3** PXR D patterns of (a) Cu<sub>2</sub>O/HKUST-1 core/sheath nanowires covered with octahedral and spike-like particles, (b) simulated HKUST-1, and (c) standard Cu<sub>2</sub>O.

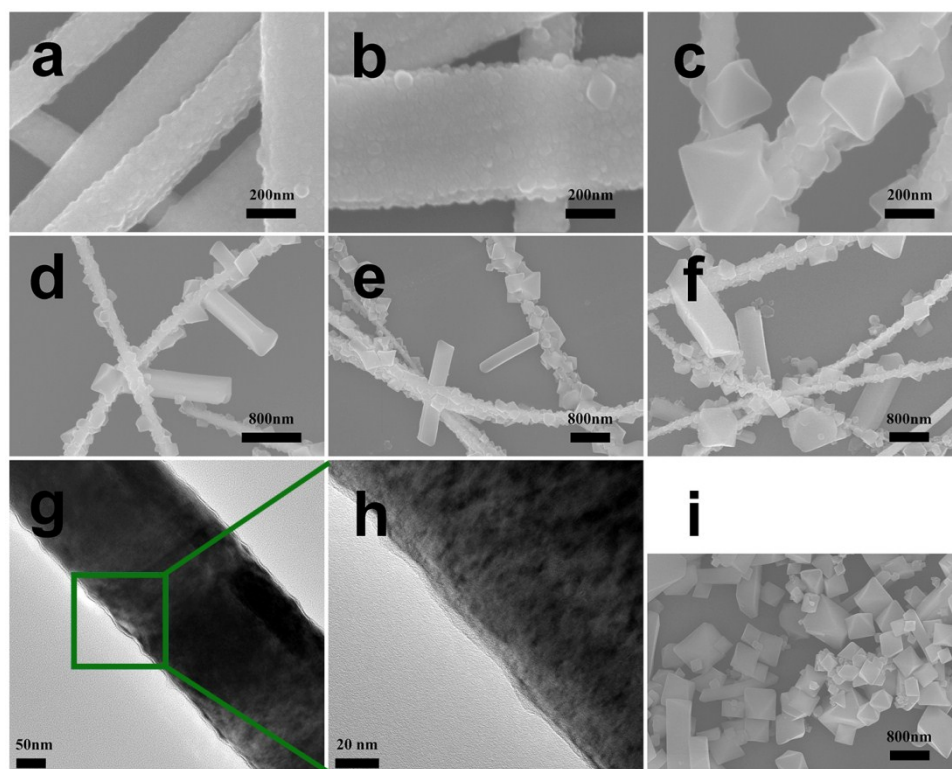

**Fig. S4** FESEM images of Cu<sub>2</sub>O/HKUST-1 core/sheath nanowires covered with octahedral and spike-like particles by reacting with 2 mL of 0.04M H<sub>3</sub>BTC ethanol/water solution with volume ratio of 9:1 for (a) 3 min; (b) 5 min; (c) 10 min; (d) 15 min; (e) 20 min and (f, i) 35min. TEM images obtained after reaction for 3 min (g, h); the green box in (g) is the location of (h) after being magnified.

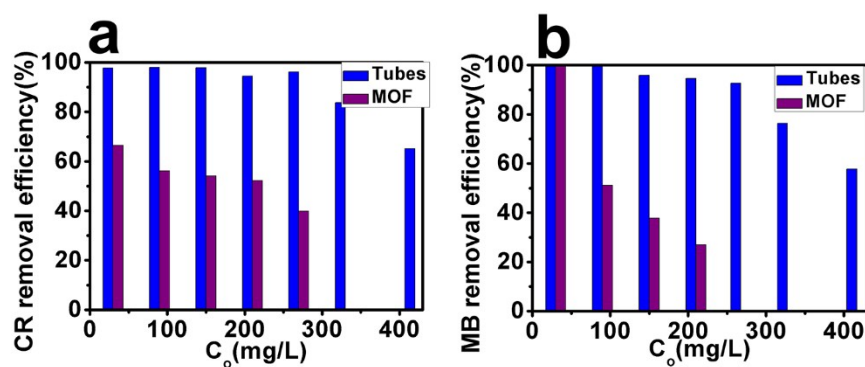

**Fig. S5** The uptake percentage of CR (a) and MB (b) dyes by HKUST-1 nanotubes and the HKUST-1 primitive particles

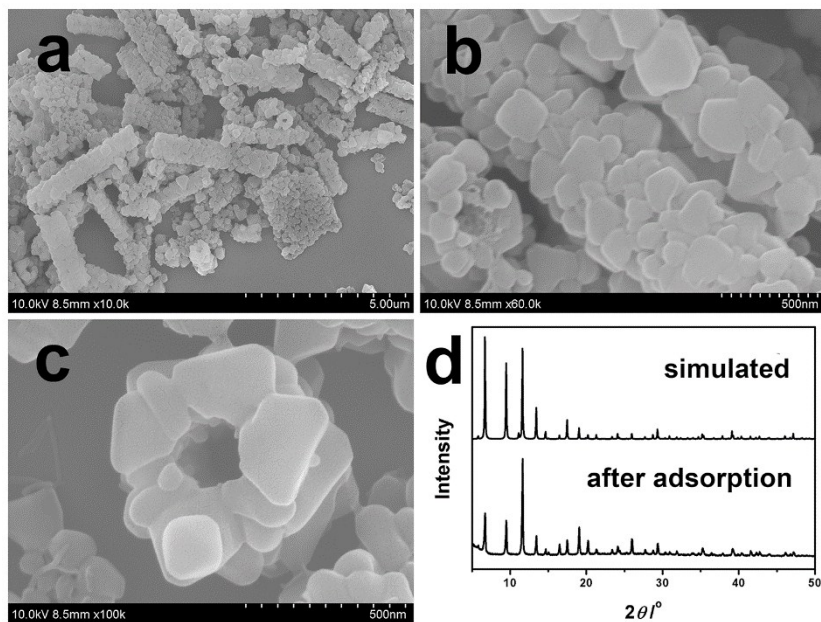

**Fig. S6** (a-c) FESEM images and (d) PXRD of HKUST-1 nanotubes after regeneration from the desorption of CR dye.

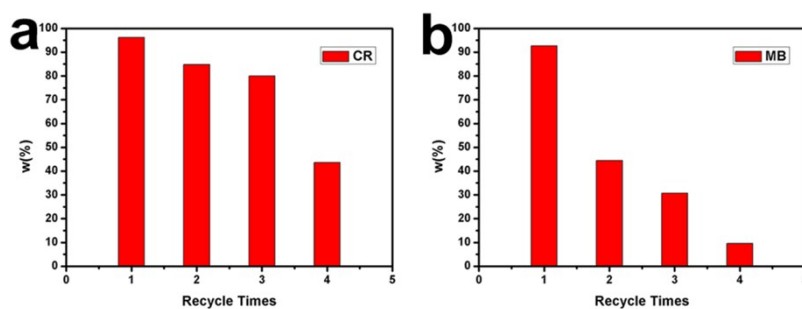

**Fig. S7** Cycle measurements of the as-prepared HKUST-1 nanotubes as the adsorbent for (a) CR

and (b) MB.

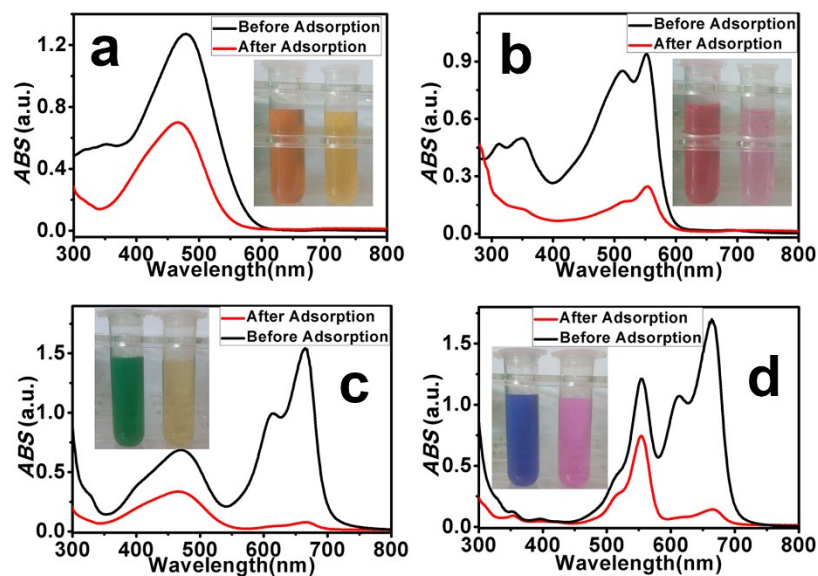

**Fig. S8** The selective adsorption capability of HKUST-1 nanotubes toward the mixed dyes: (a) CR and MO, (b) CR and RhB, (c) MB and MO, and (d) MB and RhB. Inset: the color change of the mixed dyes solution before and after adsorption experiments.

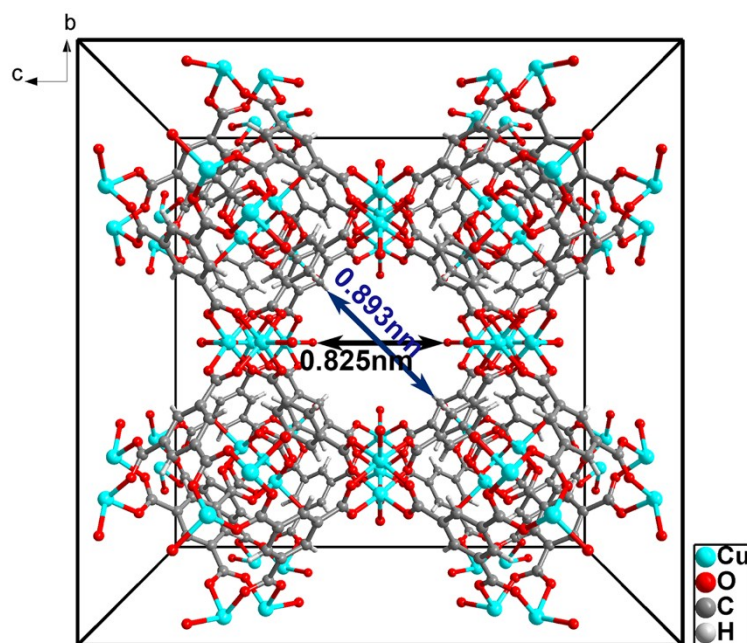

**Fig. S9** The environment and size of the 1D micropore in HKUST-1.

#### Reference:

1. Y. Tan, X. Xue, Q. Peng, H. Zhao, T. Wang, and Y. Li, *Nano Letters*, 2007, 7, 3723-3728.
2. E. García-Pérez, J. Gascón, V. Morales-Flórez, J. Castillo, F. Kapteijn, and S. Calero, *Langmuir*, 2009, 25, 1725-1731.
